# Supplementary material
Source: PubMed Central journal article supplement (PMC3357459)
Supplement: NIHMS355371-supplement-Supp_Fig_S4.pdf [file NIHMS355371-supplement-Supp_Fig_S4.pdf]

### Figure 4: Change in Pulmonary Function Over Course of Clinical Trials

#### 4a. Change in Individual FVC Measurements Over Time

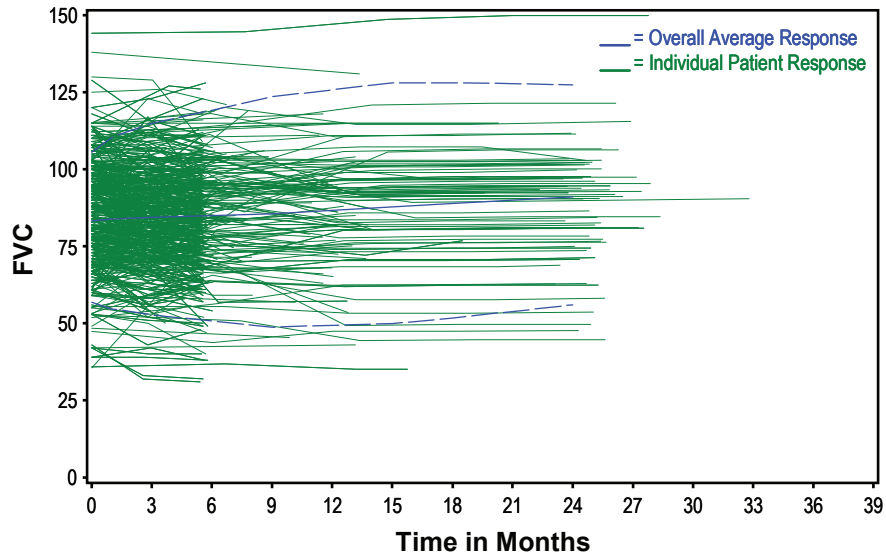

The average line is produced by calculating the average value at each timepoint, and smoothing this curve using a Lowess Function

#### 4b. Change in Individual DLCO Measurements Over Time

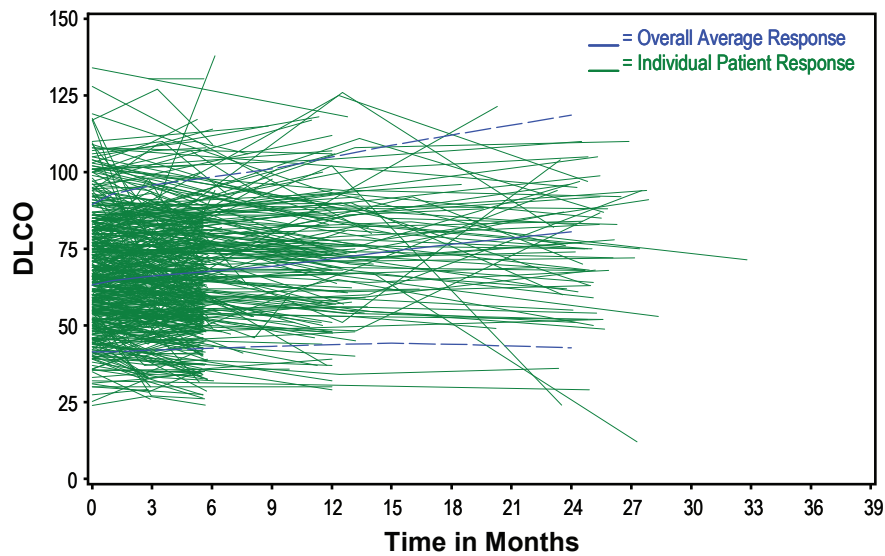

The average line is produced by calculating the average value at each timepoint, and smoothing this curve using a Lowess Function
